# Supplementary material
Source: publisher site journal article supplement (https://www.dovepress.com/article/328788)
Supplement: Supplementary file 1 [file get_supplementary_file.php]

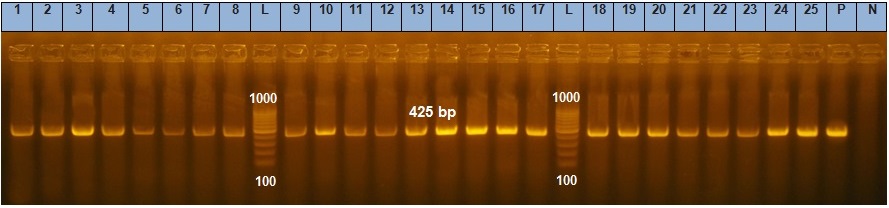


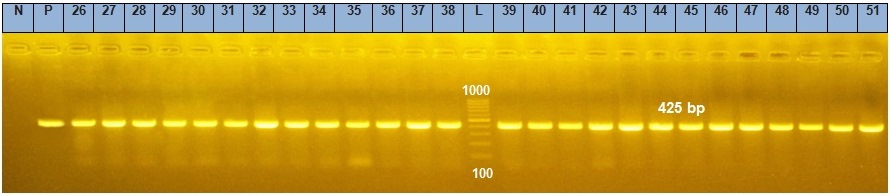


**Figure S1:** Agarose gel electrophoresis of the PCR analysis of *rec*A gene (425 bp) of the 51 *A. baumannii* clinical isolates. N, negative control (PCR reaction without recA primers), P, Positive control (PCR reaction with chromosomal DNA of *A. baumannii* ATCC 17978 as a PCR template*)*.


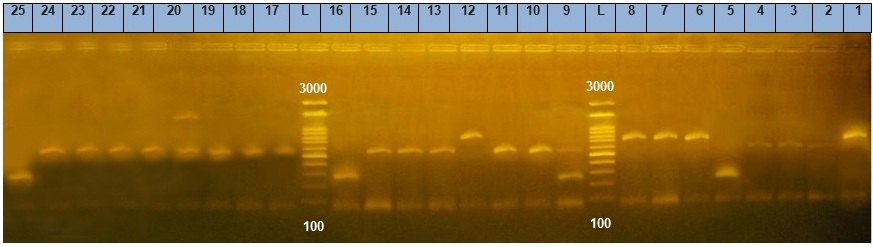


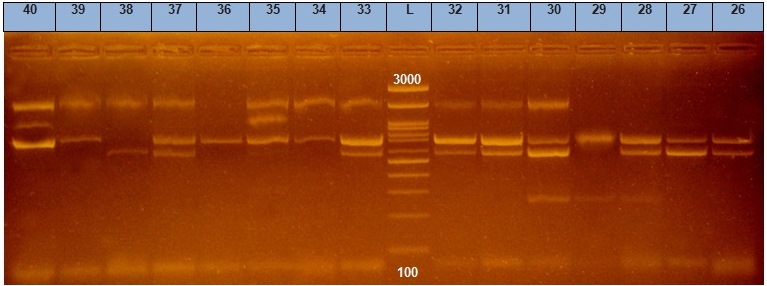


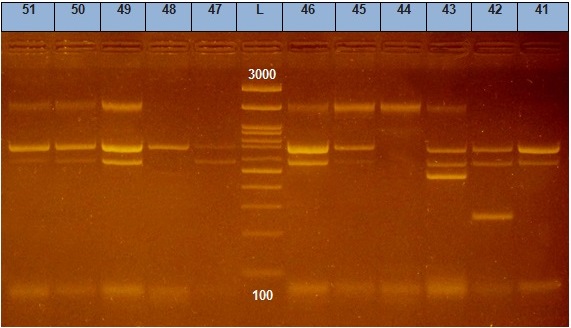


**Figure S2:** Agarose gel electrophoresis of the ERIC-PCR analysis of the 51 MDR *A. baumannii* clinical isolates.

**Figure S3**. FICI values of three tested antibiotic combinations against nine MDR *A. baumannii*


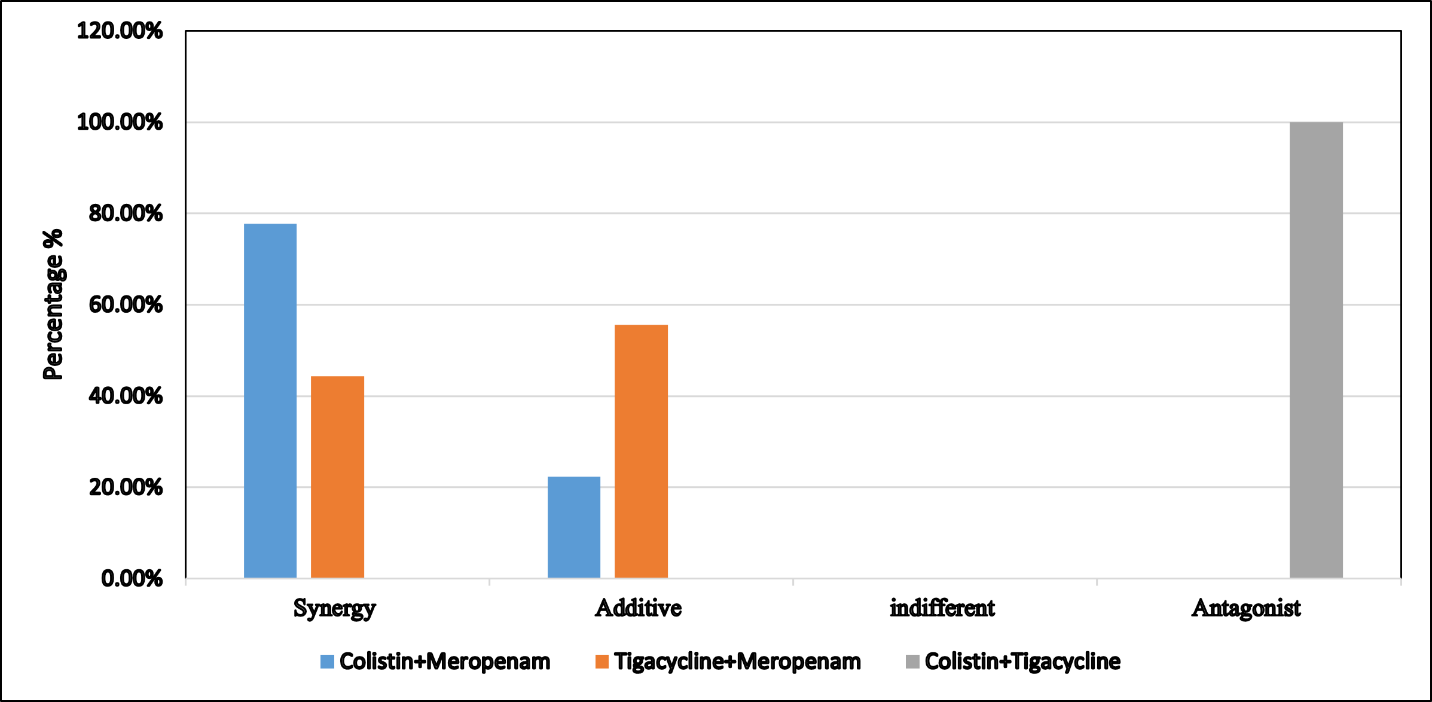


**Figure S4**. Total percentage of synergy, additive, and antagonistic effects of three tested antibiotic combinations (CT+MEM, TGC+MEM and TGC+CT) against MDR A. baumannii (n=9)


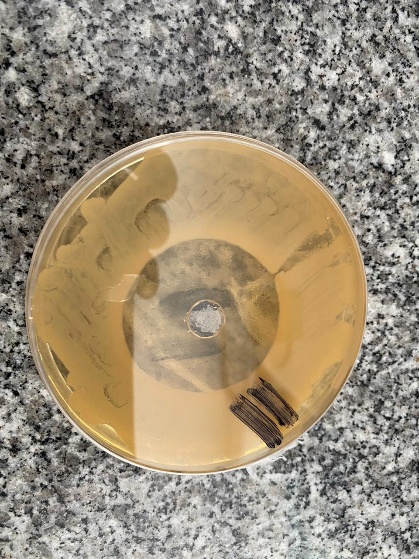

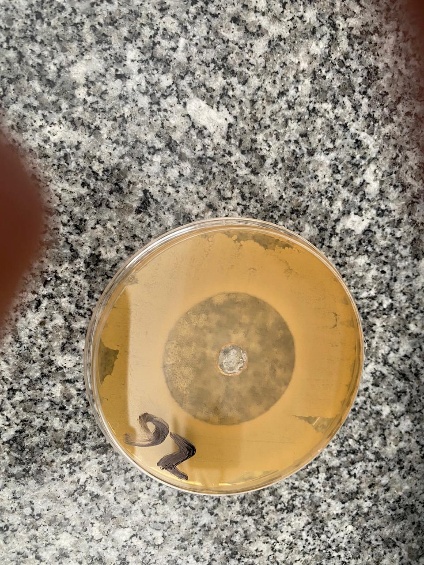

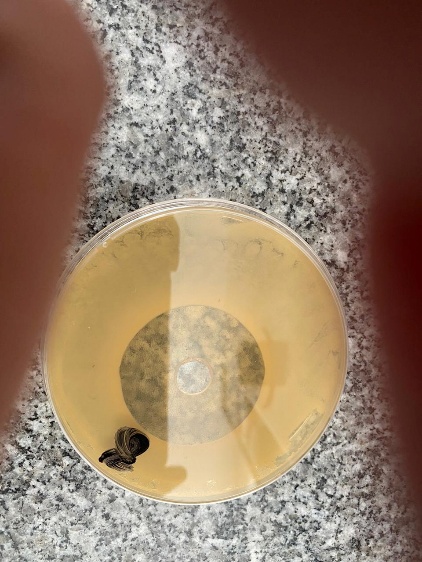

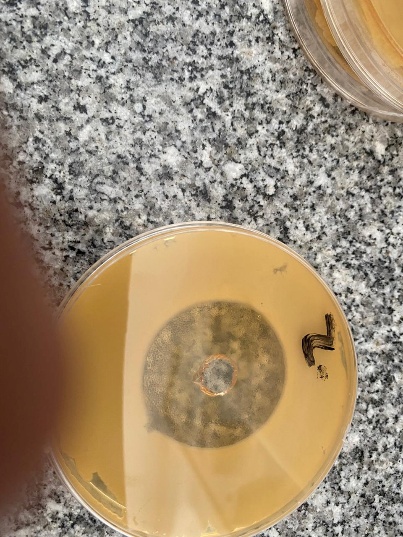

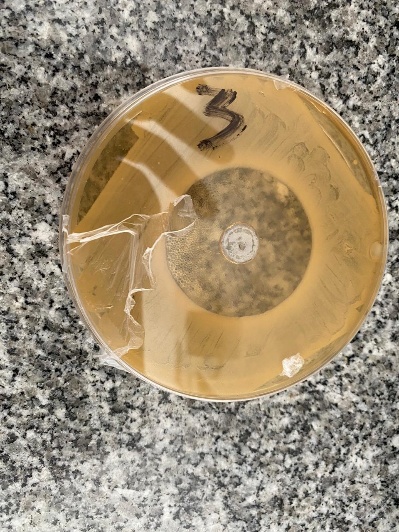

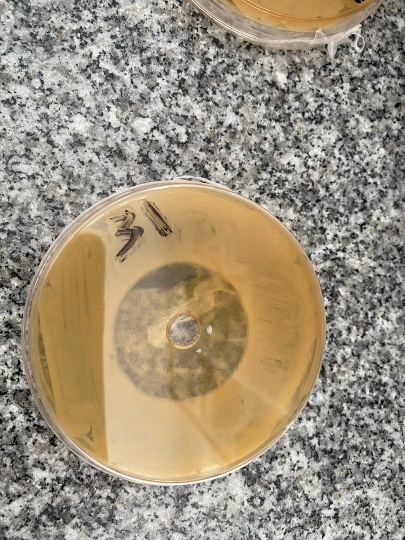

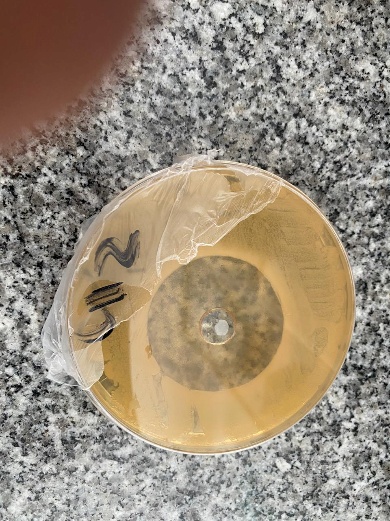

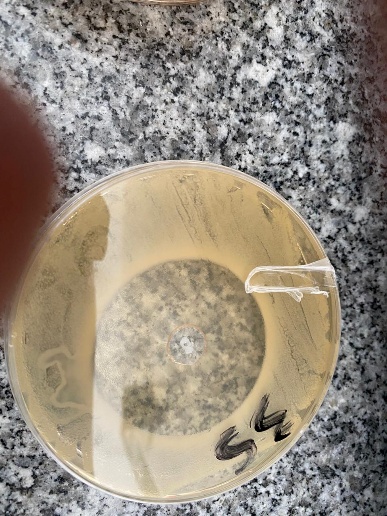

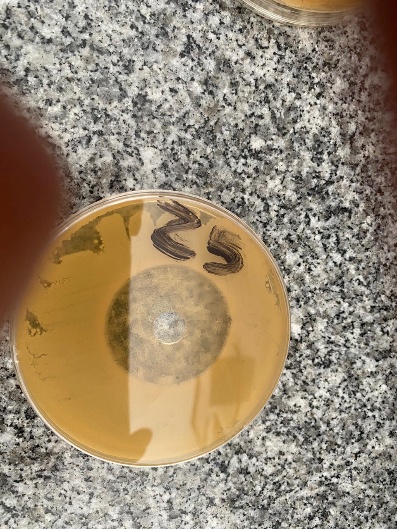


**Figure S5**. Well-cut Diffusion Technique antimicrobial test.

**Table S1:** Antibiogram analysis of the 51 of *A. baumannii* clinical isolates.

| **Isolate code** | **Antimicrobial agents** | | | | | | | | | | | | | |
| --- | --- | --- | --- | --- | --- | --- | --- | --- | --- | --- | --- | --- | --- | --- |
| **PIP** | **FEP** | **CN** | **CRO** | **AK** | **IPM** | **CIP** | **SXT** | **SAM** | **DO** | **TPZ** | **MEM** | **TGC** | **CT** |
| **A1** | **R** | **R** | **R** | **R** | **R** | **R** | **R** | **R** | **R** | **R** | **R** | **R** | **S** | **S** |
| **A2** | **R** | **R** | **R** | **R** | **R** | **R** | **R** | **R** | **R** | **R** | **R** | **R** | **S** | **S** |
| **A3** | **R** | **R** | **R** | **R** | **R** | **R** | **R** | **R** | **R** | **R** | **R** | **R** | **S** | **S** |
| **A4** | **R** | **R** | **R** | **R** | **R** | **R** | **R** | **R** | **R** | **R** | **R** | **R** | **S** | **S** |
| **A5** | **R** | **R** | **R** | **R** | **R** | **R** | **R** | **R** | **R** | **R** | **R** | **R** | **S** | **S** |
| **A6** | **R** | **R** | **R** | **R** | **R** | **R** | **R** | **R** | **R** | **R** | **R** | **R** | **S** | **S** |
| **A7** | **R** | **R** | **R** | **R** | **R** | **R** | **R** | **S** | **R** | **R** | **R** | **R** | **S** | **S** |
| **A8** | **R** | **R** | **R** | **R** | **R** | **R** | **R** | **R** | **R** | **R** | **R** | **R** | **S** | **S** |
| **A9** | **R** | **R** | **R** | **R** | **R** | **R** | **R** | **R** | **R** | **R** | **R** | **R** | **S** | **S** |
| **A10** | **R** | **R** | **R** | **R** | **R** | **R** | **R** | **R** | **R** | **R** | **R** | **R** | **S** | **S** |
| **A11** | **R** | **R** | **S** | **R** | **R** | **R** | **R** | **R** | **R** | **R** | **R** | **R** | **S** | **S** |
| **A12** | **R** | **R** | **R** | **R** | **R** | **R** | **R** | **R** | **R** | **R** | **R** | **R** | **S** | **R** |
| **A13** | **R** | **R** | **R** | **R** | **R** | **R** | **R** | **R** | **R** | **R** | **R** | **R** | **S** | **S** |
| **A14** | **R** | **R** | **R** | **R** | **R** | **R** | **R** | **R** | **R** | **R** | **R** | **R** | **S** | **S** |
| **A15** | **R** | **R** | **R** | **R** | **R** | **R** | **R** | **R** | **R** | **R** | **R** | **R** | **S** | **S** |
| **A16** | **R** | **R** | **R** | **R** | **R** | **R** | **R** | **R** | **R** | **R** | **R** | **R** | **S** | **S** |
| **A17** | **R** | **R** | **R** | **R** | **R** | **R** | **R** | **R** | **R** | **R** | **R** | **R** | **S** | **S** |
| **A18** | **R** | **R** | **R** | **R** | **R** | **R** | **R** | **R** | **R** | **R** | **R** | **R** | **S** | **S** |
| **A19** | **R** | **R** | **R** | **R** | **R** | **R** | **R** | **R** | **R** | **R** | **R** | **R** | **S** | **S** |
| **A20** | **R** | **R** | **R** | **R** | **R** | **R** | **R** | **R** | **R** | **R** | **R** | **R** | **S** | **S** |
| **A21** | **R** | **R** | **R** | **R** | **R** | **R** | **R** | **R** | **R** | **R** | **R** | **R** | **S** | **S** |
| **A22** | **R** | **R** | **R** | **R** | **R** | **R** | **R** | **R** | **R** | **R** | **R** | **R** | **S** | **S** |
| **A23** | **R** | **R** | **R** | **R** | **R** | **R** | **R** | **R** | **R** | **R** | **R** | **R** | **S** | **S** |
| **A24** | **R** | **R** | **R** | **R** | **R** | **R** | **R** | **R** | **R** | **R** | **R** | **R** | **S** | **S** |
| **A25** | **R** | **R** | **R** | **R** | **R** | **R** | **R** | **R** | **R** | **R** | **R** | **R** | **S** | **S** |
| **A26** | **R** | **R** | **R** | **R** | **R** | **R** | **R** | **R** | **R** | **R** | **R** | **R** | **R** | **S** |
| **A27** | **R** | **R** | **R** | **R** | **R** | **R** | **R** | **R** | **R** | **R** | **R** | **R** | **S** | **S** |
| **A28** | **R** | **R** | **R** | **R** | **R** | **R** | **R** | **R** | **R** | **R** | **R** | **R** | **S** | **S** |
| **A29** | **R** | **R** | **R** | **R** | **R** | **R** | **R** | **R** | **R** | **R** | **R** | **R** | **R** | **S** |
| **A30** | **R** | **R** | **R** | **R** | **R** | **R** | **R** | **R** | **R** | **R** | **R** | **R** | **S** | **S** |
| **A31** | **R** | **R** | **R** | **R** | **R** | **R** | **R** | **R** | **R** | **R** | **R** | **R** | **S** | **S** |
| **A32** | **R** | **R** | **R** | **R** | **S** | **R** | **R** | **R** | **R** | **R** | **R** | **R** | **S** | **S** |
| **A33** | **R** | **R** | **R** | **R** | **R** | **R** | **R** | **R** | **R** | **R** | **R** | **R** | **S** | **S** |
| **A34** | **R** | **R** | **S** | **R** | **R** | **R** | **R** | **R** | **R** | **R** | **R** | **R** | **S** | **S** |
| **A35** | **R** | **R** | **R** | **R** | **R** | **R** | **R** | **R** | **R** | **R** | **R** | **R** | **S** | **S** |
| **A36** | **R** | **R** | **R** | **R** | **R** | **R** | **R** | **R** | **R** | **R** | **R** | **R** | **S** | **S** |
| **A37** | **R** | **R** | **R** | **R** | **R** | **R** | **R** | **R** | **R** | **R** | **R** | **R** | **S** | **S** |
| **A38** | **R** | **R** | **R** | **R** | **R** | **R** | **R** | **R** | **R** | **R** | **R** | **R** | **S** | **S** |
| **A39** | **R** | **R** | **R** | **R** | **R** | **R** | **R** | **R** | **R** | **R** | **R** | **R** | **S** | **S** |
| **A40** | **R** | **R** | **R** | **R** | **R** | **R** | **R** | **R** | **R** | **R** | **R** | **R** | **S** | **S** |
| **A41** | **R** | **R** | **R** | **R** | **R** | **R** | **R** | **R** | **R** | **R** | **R** | **R** | **S** | **S** |
| **A42** | **R** | **R** | **R** | **R** | **R** | **R** | **R** | **R** | **R** | **R** | **R** | **R** | **S** | **S** |
| **A43** | **R** | **R** | **R** | **R** | **R** | **R** | **R** | **R** | **R** | **R** | **R** | **R** | **S** | **S** |
| **A44** | **R** | **R** | **R** | **R** | **R** | **R** | **R** | **R** | **R** | **R** | **R** | **R** | **S** | **S** |
| **A45** | **R** | **R** | **R** | **R** | **R** | **R** | **R** | **R** | **R** | **R** | **R** | **R** | **S** | **S** |
| **A46** | **R** | **R** | **R** | **R** | **R** | **R** | **R** | **R** | **R** | **R** | **R** | **R** | **S** | **S** |
| **A47** | **R** | **R** | **R** | **R** | **R** | **R** | **R** | **R** | **R** | **R** | **R** | **R** | **S** | **S** |
| **A48** | **R** | **R** | **R** | **R** | **S** | **R** | **R** | **R** | **S** | **R** | **R** | **R** | **S** | **S** |
| **A49** | **R** | **R** | **R** | **R** | **S** | **R** | **R** | **R** | **R** | **R** | **R** | **R** | **S** | **R** |
| **A50** | **R** | **R** | **R** | **R** | **S** | **R** | **R** | **R** | **S** | **R** | **R** | **R** | **S** | **S** |
| **A51** | **R** | **R** | **R** | **R** | **R** | **R** | **R** | **R** | **R** | **R** | **R** | **R** | **S** | **S** |

R, resistant; S, Senstive. Piperacillin (PIP, 100 μg), piperacillin/tazobactam (TPZ, 10/100 μg), ampicillin-sulbactam (SAM, 10/10 μg), cefepime (FEP, 30 μg), ceftriaxone (CRO, 30 μg), Amikacin (AK, 30), gentamicin (CN, 30 mcg), ciprofloxacin (CIP, 5 mcg), imipenem (IMP, 10 μg), meropenem (MEM, 10 μg), doxycycline (DO, 30 μg), Trimethoprim-sulfamethoxazole (SXT, 1.25/23.7), tigecycline (TGC, 15 μg), colistin (CT).

**Table S2.** MIC values (µg/ml) of the tested antibiotics either alone or in combinations

| **Isolate Code** | **MIC (µg/ml)** | | | | | |
| --- | --- | --- | --- | --- | --- | --- |
| **CT** | **TGC** | **MEM** | **CT+MEM** | **TGC+MEM** | **CT+TGC** |
| A3 | 2.0 | 2.0 | 64.0 | 0.5 | 1.0 | 8.0 |
| A8 | 1.0 | 0.5 | 64.0 | 0.25 | 0.25 | 4.0 |
| A11 | 1.0 | 2.0 | 32.0 | 0.25 | 0.5 | 4.0 |
| A20 | 2.0 | 0.5 | 64.0 | 0.5 | 0.25 | 4.0 |
| A25 | 1.0 | 0.5 | 64.0 | 0.25 | 0.25 | 4.0 |
| A26 | 1.0 | 3.0 | 64.0 | 0.5 | 1.0 | 4.0 |
| A31 | 1.0 | 0.5 | 64.0 | 0.5 | 0.25 | 4.0 |
| A35 | 2.0 | 2.0 | 64.0 | 0.5 | 0.5 | 8.0 |
| A42 | 2.0 | 2.0 | 64.0 | 0.25 | 0.5 | 8.0 |

MIC, minimum inhibitory concentration; CT, colistin; MEM, meropenem; TGC, tigecycline
